# Supplementary material for: Genome-Wide Association Study on Male Genital Shape and Size in Drosophila melanogaster
Source: PLoS One. 2015 Jul 16;10(7):e0132846. doi: 10.1371/journal.pone.0132846 (PMC4504508; doi:10.1371/journal.pone.0132846)
Supplement: S4 Table — For SNPs with P-values > 10-3, ID, minor and major alleles, minor allele frequency (MAF), minor allele count, major allele count, P-value and Q-value are listed. (XLSX) [file pone.0132846.s009.xlsx]

## Sheet: Table S4
	ID	MinorAllele	MajorAllele	MAF	Minor Allele Count	Major Allele Count	P value	Q value
	2L_549339_SNP	C	T	0.4795	70	76	8.768e-05	0.939936
	2L_661616_SNP	T	C	0.3688	52	89	4.519e-05	0.939936
	2L_1823253_SNP	A	C	0.1769	26	121	7.13e-05	0.939936
	2L_1823346_INS	G	GAAAG	0.2517	36	107	2.784e-05	0.939936
	2L_1823396_SNP	C	A	0.2357	33	107	4.154e-06	0.939936
	2L_3220125_SNP	T	A	0.4815	65	70	1.176e-05	0.939936
	2L_6351893_SNP	C	G	0.2517	37	110	6.928e-05	0.939936
	2L_7045893_SNP	A	C	0.4206	53	73	8.494e-06	0.939936
	2L_7696878_SNP	A	T	0.2083	30	114	3.123e-05	0.939936
	2L_8262172_SNP	T	C	0.1773	25	116	9.456e-05	0.939936
	2L_8266217_SNP	T	C	0.4296	61	81	8.555e-05	0.939936
	2L_8266360_SNP	A	G	0.2993	41	96	7.451e-05	0.939936
	2L_8266558_DEL	T	TT	0.06711	10	139	6.172e-05	0.939936
	2L_8267635_SNP	A	C	0.08054	12	137	9.108e-05	0.939936
	2L_8268472_SNP	A	G	0.08667	13	137	6.036e-05	0.939936
	2L_8268927_SNP	T	C	0.06711	10	139	6.011e-05	0.939936
	2L_8269023_SNP	A	G	0.06667	10	140	6.185e-05	0.939936
	2L_8272467_SNP	G	A	0.06	9	141	6.944e-05	0.939936
	2L_8275037_SNP	C	T	0.0604	9	140	7.147e-05	0.939936
	2L_8275052_SNP	T	A	0.06294	9	134	5.46e-05	0.939936
	2L_8275117_SNP	A	T	0.0625	9	135	7.435e-05	0.939936
	2L_8275995_SNP	A	C	0.06	9	141	6.944e-05	0.939936
	2L_8277304_SNP	A	G	0.06	9	141	6.944e-05	0.939936
	2L_8558261_DEL	ACAT	A	0.3357	47	93	5.081e-05	0.939936
	2L_9166489_SNP	A	G	0.3358	46	91	4.012e-05	0.939936
	2L_9174240_SNP	A	G	0.1565	23	124	7.718e-05	0.939936
	2L_9313378_DEL	G	GGTGGCACAG	0.4	58	87	9.285e-05	0.939936
	2L_9313754_SNP	T	C	0.4792	69	75	2.485e-05	0.939936
	2L_9406003_SNP	C	A	0.2695	38	103	7.684e-05	0.939936
	2L_10099990_SNP	C	T	0.3309	46	93	8.163e-05	0.939936
	2L_12344105_SNP	G	A	0.2482	35	106	6.444e-05	0.939936
	2L_14798597_SNP	G	A	0.469	68	77	2.538e-05	0.939936
	2L_14798641_SNP	G	T	0.4722	68	76	9.069e-05	0.939936
	2L_16703121_SNP	T	C	0.1133	17	133	9.518e-05	0.939936
	2L_17102236_SNP	A	G	0.2148	29	106	4.131e-05	0.939936
	2L_18166422_SNP	A	G	0.06081	9	139	9.276e-05	0.939936
	2L_18172157_SNP	T	A	0.06122	9	138	8.862e-05	0.939936
	2L_18192353_SNP	T	A	0.07432	11	137	3.409e-05	0.939936
	2L_18198326_SNP	T	C	0.2446	34	105	8.761e-05	0.939936
	2L_19341467_SNP	A	C	0.1597	23	121	7.839e-05	0.939936
	2L_19341703_SNP	A	C	0.06757	10	138	2.876e-05	0.939936
	2L_19341772_SNP	T	C	0.06122	9	138	9.852e-05	0.939936
	2L_20303035_SNP	A	C	0.2823	35	89	9.867e-05	0.939936
	2L_21102507_INS	TT	T	0.4559	62	74	9.456e-05	0.939936
	2L_21977756_DEL	C	CTGACAC	0.1901	27	115	6.042e-05	0.939936
	2R_2945164_SNP	T	C	0.4468	63	78	8.818e-05	0.939936
	2R_2945170_SNP	T	A	0.4357	61	79	9.713e-05	0.939936
	2R_6225574_SNP	T	G	0.2766	39	102	5.059e-05	0.939936
	2R_6992312_DEL	C	TATA	0.3636	52	91	2.555e-05	0.939936
	2R_7300521_DEL	C	CAAG	0.4497	67	82	2.463e-05	0.939936
	2R_7814948_SNP	A	T	0.3469	51	96	7.674e-05	0.939936
	2R_7878301_SNP	A	T	0.4167	60	84	9.372e-05	0.939936
	2R_10015193_SNP	G	A	0.4755	68	75	9.339e-05	0.939936
	2R_10945963_SNP	T	C	0.4795	70	76	2.647e-05	0.939936
	2R_11703489_SNP	T	G	0.05263	8	144	1.644e-05	0.939936
	2R_12397048_INS	TTT	T	0.05298	8	143	9.772e-05	0.939936
	2R_12397082_SNP	T	A	0.06	9	141	7.12e-05	0.939936
	2R_12397083_SNP	A	T	0.0604	9	140	6.876e-05	0.939936
	2R_13646097_DEL	G	GGGGATGCCCAG	0.06757	10	138	4.827e-06	0.939936
	2R_13685514_SNP	A	G	0.4771	73	80	8.462e-05	0.939936
	2R_13689864_SNP	T	C	0.09272	14	137	4.299e-05	0.939936
	2R_13814927_SNP	C	G	0.4828	70	75	2.036e-05	0.939936
	2R_13814937_SNP	T	A	0.4238	64	87	4.433e-05	0.939936
	2R_13814943_SNP	G	A	0.4267	64	86	6.074e-05	0.939936
	2R_13814953_SNP	T	C	0.4014	59	88	3.962e-05	0.939936
	2R_13815024_SNP	T	C	0.4658	68	78	9.063e-06	0.939936
	2R_13815048_SNP	C	G	0.4658	68	78	2.795e-06	0.939936
	2R_13892860_SNP	G	C	0.3919	58	90	3.956e-05	0.939936
	2R_13965290_SNP	G	T	0.4354	64	83	9.999e-05	0.939936
	2R_14295014_SNP	T	A	0.4194	52	72	4.318e-05	0.939936
	2R_15920674_SNP	G	A	0.07333	11	139	3.094e-05	0.939936
	2R_15920713_SNP	G	T	0.1293	19	128	4.601e-05	0.939936
	2R_16453379_SNP	T	A	0.1391	21	130	4.359e-05	0.939936
	2R_16453380_SNP	C	A	0.1382	21	131	3.671e-05	0.939936
	2R_16514059_SNP	T	C	0.1391	21	130	7.401e-05	0.939936
	2R_18825876_SNP	C	T	0.3356	50	99	4.748e-05	0.939936
	3L_429994_SNP	T	G	0.3245	49	102	7.565e-05	0.939936
	3L_667188_SNP	A	G	0.366	56	97	3.321e-05	0.939936
	3L_699691_SNP	A	G	0.4533	68	82	6.508e-05	0.939936
	3L_705496_SNP	G	C	0.1842	28	124	6.706e-05	0.939936
	3L_705499_SNP	C	T	0.1633	24	123	9.879e-05	0.939936
	3L_709168_SNP	A	T	0.08725	13	136	5.518e-05	0.939936
	3L_857522_SNP	C	T	0.2649	40	111	4.09e-05	0.939936
	3L_857527_SNP	T	A	0.281	43	110	4.462e-05	0.939936
	3L_857545_SNP	G	A	0.2792	43	111	3.629e-05	0.939936
	3L_1020895_SNP	G	T	0.2026	31	122	8.385e-05	0.939936
	3L_1263742_SNP	G	A	0.07843	12	141	9.092e-05	0.939936
	3L_1566342_SNP	T	A	0.2237	34	118	9.539e-05	0.939936
	3L_1566611_SNP	A	C	0.1757	26	122	7.714e-05	0.939936
	3L_1956768_SNP	C	T	0.3026	46	106	5.17e-05	0.939936
	3L_1956813_SNP	T	C	0.2914	44	107	7.071e-05	0.939936
	3L_1956849_SNP	T	C	0.2789	41	106	9.824e-05	0.939936
	3L_1956855_SNP	G	C	0.2848	43	108	9.581e-05	0.939936
	3L_1957191_SNP	C	G	0.2848	43	108	2.221e-05	0.939936
	3L_2139784_SNP	T	C	0.1046	16	137	1.664e-05	0.939936
	3L_2202386_SNP	T	C	0.1589	24	127	5.607e-05	0.939936
	3L_2290068_SNP	T	A	0.1382	21	131	8.295e-05	0.939936
	3L_2430486_SNP	C	T	0.09868	15	137	9.689e-05	0.939936
	3L_2430830_SNP	C	G	0.1623	25	129	4.285e-05	0.939936
	3L_2430851_SNP	T	C	0.1569	24	129	2.023e-05	0.939936
	3L_4168312_SNP	T	G	0.3014	44	102	6.072e-05	0.939936
	3L_4480003_SNP	G	A	0.1316	20	132	3.341e-05	0.939936
	3L_4541613_SNP	T	G	0.3667	55	95	2.996e-05	0.939936
	3L_4541617_SNP	C	T	0.3533	53	97	2.388e-05	0.939936
	3L_4951054_SNP	T	C	0.2245	33	114	9.706e-05	0.939936
	3L_7423971_SNP	G	A	0.05882	9	144	5.32e-05	0.939936
	3L_7424002_SNP	T	C	0.06623	10	141	1.034e-05	0.939936
	3L_7780102_SNP	T	C	0.1579	24	128	1.355e-05	0.939936
	3L_7780276_SNP	G	A	0.2109	27	101	8.712e-05	0.939936
	3L_7782972_SNP	A	G	0.2381	35	112	2.848e-05	0.939936
	3L_7782978_DEL	T	TT	0.2536	35	103	4.65e-05	0.939936
	3L_7832921_SNP	G	C	0.2013	30	119	4.562e-05	0.939936
	3L_8009478_INS	ACT	A	0.08108	12	136	9.872e-05	0.939936
	3L_10328423_SNP	T	G	0.24	36	114	5.773e-05	0.939936
	3L_10483203_SNP	G	A	0.1986	29	117	4.957e-05	0.939936
	3L_10483376_SNP	T	C	0.2609	36	102	4.645e-05	0.939936
	3L_10484864_SNP	A	G	0.3046	46	105	5.891e-05	0.939936
	3L_10484897_SNP	T	A	0.3453	48	91	9.296e-05	0.939936
	3L_10484966_SNP	C	T	0.4437	67	84	4.381e-05	0.939936
	3L_11031740_INS	CTAAA	C	0.1	15	135	5.275e-06	0.939936
	3L_11031744_INS	AGATAATA	A	0.106	16	135	1.351e-05	0.939936
	3L_11031759_SNP	A	T	0.1275	19	130	4.039e-05	0.939936
	3L_11031783_SNP	C	A	0.1184	18	134	8.442e-06	0.939936
	3L_11031785_SNP	T	A	0.1208	18	131	2.792e-05	0.939936
	3L_11037323_DEL	A	ACCGA	0.05161	8	147	4.886e-06	0.939936
	3L_11037405_SNP	G	A	0.05405	8	140	2.32e-06	0.939936
	3L_11377390_INS	A	AC	0.1879	28	121	9.593e-05	0.939936
	3L_11414010_SNP	T	G	0.3286	46	94	4.736e-05	0.939936
	3L_11414011_SNP	G	T	0.3026	46	106	3.689e-05	0.939936
	3L_12126967_SNP	T	C	0.2208	34	120	4.388e-05	0.939936
	3L_12148634_SNP	T	C	0.1788	27	124	2.49e-06	0.939936
	3L_12175730_SNP	A	T	0.07843	12	141	2.396e-07	0.455753
	3L_12176095_SNP	A	G	0.09804	15	138	2.66e-05	0.939936
	3L_13764854_SNP	C	A	0.1275	19	130	8.674e-06	0.939936
	3L_13764855_SNP	C	G	0.1333	20	130	8.345e-06	0.939936
	3L_13978968_SNP	A	G	0.1176	18	135	2.743e-05	0.939936
	3L_14578919_SNP	T	A	0.2192	32	114	2.013e-05	0.939936
	3L_17182849_SNP	G	C	0.4545	65	78	9.209e-05	0.939936
	3L_17935968_SNP	G	A	0.06803	10	137	1.061e-05	0.939936
	3L_19969709_SNP	C	T	0.1497	22	125	4.18e-05	0.939936
	3L_20214515_INS	A	AA	0.1151	16	123	8.015e-06	0.939936
	3L_20929849_SNP	A	C	0.4658	68	78	3.137e-05	0.939936
	3R_441403_SNP	T	G	0.07483	11	136	3.039e-05	0.939936
	3R_445864_SNP	A	C	0.0922	13	128	8.789e-05	0.939936
	3R_461905_SNP	G	A	0.06081	9	139	9.987e-05	0.939936
	3R_3330365_SNP	T	C	0.09396	14	135	8.021e-05	0.939936
	3R_3777467_SNP	A	G	0.1806	26	118	2.531e-05	0.939936
	3R_3895423_SNP	T	A	0.4126	59	84	2.432e-05	0.939936
	3R_4079924_SNP	C	T	0.06	9	141	1.596e-05	0.939936
	3R_4265890_SNP	C	T	0.3662	52	90	5.102e-05	0.939936
	3R_4286702_SNP	A	G	0.05921	9	143	8.017e-05	0.939936
	3R_5688648_SNP	T	C	0.08725	13	136	5.12e-05	0.939936
	3R_6312428_SNP	T	A	0.08725	13	136	2.093e-05	0.939936
	3R_6345511_SNP	A	G	0.2431	35	109	5.018e-05	0.939936
	3R_6966699_SNP	T	A	0.1216	18	130	6.713e-05	0.939936
	3R_7074031_SNP	A	G	0.09524	14	133	6.247e-05	0.939936
	3R_8791973_SNP	C	G	0.1757	26	122	8.802e-05	0.939936
	3R_9379128_SNP	T	C	0.3061	45	102	3.034e-05	0.939936
	3R_11443019_SNP	C	T	0.3521	50	92	4.118e-05	0.939936
	3R_11443027_SNP	C	A	0.3497	50	93	9.387e-05	0.939936
	3R_11606270_SNP	A	G	0.2568	38	110	5.135e-05	0.939936
	3R_11606282_SNP	G	A	0.2466	36	110	3.857e-05	0.939936
	3R_13694793_SNP	T	C	0.4558	67	80	9.096e-05	0.939936
	3R_14147650_SNP	A	T	0.2483	37	112	9.287e-05	0.939936
	3R_14197766_SNP	A	C	0.3985	53	80	8.426e-05	0.939936
	3R_14333382_SNP	T	C	0.1812	27	122	4.111e-05	0.939936
	3R_14913820_SNP	A	G	0.1208	18	131	3.271e-06	0.939936
	3R_15055309_SNP	T	C	0.07792	12	142	8.964e-05	0.939936
	3R_16913811_SNP	T	A	0.07333	11	139	8.24e-05	0.939936
	3R_19033835_SNP	T	C	0.05369	8	141	2.438e-05	0.939936
	3R_19911432_SNP	C	G	0.05844	9	145	8.657e-05	0.939936
	3R_21438858_SNP	C	G	0.05369	8	141	3.913e-05	0.939936
	3R_23103307_SNP	C	G	0.07333	11	139	4.981e-05	0.939936
	3R_24487463_SNP	C	G	0.2338	36	118	4.582e-05	0.939936
	3R_26050531_SNP	T	C	0.1192	18	133	6.749e-05	0.939936
	X_5863509_DEL	T	TT	0.1118	17	135	5.656e-05	0.939936
	X_8346455_SNP	C	A	0.1867	28	122	2.145e-05	0.939936
	X_8346468_SNP	T	A	0.1948	30	124	7.589e-05	0.939936
	X_8346502_SNP	G	A	0.2069	30	115	8.502e-05	0.939936
	X_8346504_SNP	A	G	0.2055	30	116	7.451e-05	0.939936
	X_8346544_SNP	T	C	0.2	29	116	5.846e-05	0.939936
	X_9067696_SNP	C	T	0.1712	25	121	7.925e-05	0.939936
	X_9403889_SNP	A	G	0.0719	11	142	4.242e-05	0.939936
	X_9403890_INS	GC	G	0.0719	11	142	2.61e-05	0.939936
	X_11853614_SNP	T	C	0.08844	13	134	3.143e-05	0.939936
	X_12676028_SNP	T	C	0.07843	12	141	5.899e-05	0.939936
	X_12944491_SNP	G	T	0.06569	9	128	7.93e-05	0.939936
	X_14239509_SNP	G	T	0.05229	8	145	5.982e-05	0.939936
	X_14239849_SNP	C	T	0.05195	8	146	5.759e-05	0.939936
	X_14268184_SNP	C	G	0.26	39	111	3.755e-05	0.939936
	X_14268273_SNP	A	G	0.25	37	111	8.31e-05	0.939936
	X_14268443_SNP	C	T	0.255	38	111	5.217e-05	0.939936
	X_14268467_SNP	T	A	0.2617	39	110	4.603e-05	0.939936
	X_14268468_SNP	A	T	0.2617	39	110	3.748e-05	0.939936
	X_14280511_SNP	T	C	0.1053	16	136	7.84e-05	0.939936
	X_17575704_SNP	A	C	0.12	18	132	7.303e-05	0.939936
	X_18472862_SNP	C	T	0.07895	12	140	4.781e-05	0.939936
	X_18781868_DEL	AA	A	0.08451	12	130	2.588e-05	0.939936
	X_19012498_SNP	G	A	0.281	43	110	1.19e-05	0.939936
	X_19526922_SNP	C	A	0.3113	47	104	8.992e-05	0.939936
	X_21274391_INS	CTTATAAA	C	0.2333	35	115	5.495e-05	0.939936
